# Supplementary material for: Continuing Education for the Chiropractic Profession: A Cross-Sectional Study Analyzing Potential Barriers to Future Chiropractic Academic and Research Development
Source: Research Square preprint supplement (doi:10.21203/rs.3.rs-6866581/v1), 2025-06-19
Supplement: Supplementary file 2 [file 8602572c617876d0ac97296e.xlsx]

## Sheet: Sup D
Supplementary Table D - DC's Board oversight, CE requirement links, and terms of CE requirements by State
State	Board statute oversight	Rule Change Sponsorship*	CE renewal term (Yrs)	CCE/PACE approval required	DC's required to teach CE	Allow PACE?	Online CE allowed	Board/administrative code link
Alabama	Unknown	6	1	Y	Unk	N	Y	https://admincode.legislature.state.al.us/administrative-code/190-X-1-.19
Alaska	Dept of Commerce, Community, & Economic Development; Division of Corporations, Business, & Professional Licensing	7	2	Y	N	Y	Y	https://www.commerce.alaska.gov/web/Portals/5/pub/ChiropracticStatutes.pdf
Arizona	Unknown	7	1	Partial	N	N	Y	https://chiroboard.az.gov/sites/default/files/2023-07/CONTINUING%20EDUCATION%20STATUTUE%20AND%20RULES.pdf
Arkansas	Department of Health	7	1	Y	Y	N	Y	https://healthy.arkansas.gov/wp-content/uploads/Statutes_RulesFINAL_02-10-2021.pdf
California	Dept of Consumer Affairs	7	1	Partial	N	N	Y	https://www.chiro.ca.gov/licensees/ce_requirements.pdf
Colorado	Dept of Regulatory Agencies; Division of Professions and Occupations	6	2	N	N	N	Y	https://www.law.cornell.edu/regulations/colorado/3-CCR-707-1.10
Connecticut	Dept of Public Health	7	2	N	N	Y	Y	https://portal.ct.gov/-/media/departments-and-agencies/dph/dph/practitioner_licensing_and_investigations/plis/chiropractor/ceregsonlypdf.pdf?rev=2fd1335f60554772a0b9c1217f7009e1&hash=1AD55573525E6E4B8E6CC2AE6E68305B
Delaware	Div of Professional Regulation	7	2	Partial	Y	N	Y	https://regulations.delaware.gov/AdminCode/title24/700.pdf
District of Columbia	DC Health	6	2	N	Y	Y	Y	https://dchealth.dc.gov/sites/default/files/dc/sites/doh/publication/attachments/DC%20Regulations%20-%20Chiropractic.120916.pdf
Florida	Department of Health	6	2	Y	Y	Y	Y	https://flrules.org/gateway/ruleno.asp?id=64B2-13.004
Georgia	Georgia Secretary of State's Professional Licensing Boards Division	2025-01-02	2	Y	N	Y	Y	https://rules.sos.ga.gov/gac/100-5
Hawaii	Dept. of Commerce and Consumer Affairs	1	2	Y	N	Y	Y	https://cca.hawaii.gov/pvl/files/2013/08/har_76-c2.pdf
Idaho	Idaho Dept. of Self-Governing Agencies	1	2	Partial	N	Y	Y	https://adminrules.idaho.gov/rules/current/24/240301.pdf
Illinois	Illinois Dept. of Financial and Professional Regulation	1	3	Y	N	Y	Y	https://www.ilga.gov/commission/jcar/admincode/068/068012850A01100R.html
Indiana	Indiana Professional Licensing Agency	1	2	N	N	Y	Y	Chiropractors Resources - PLA
Iowa	Iowa Dept of Public Health	1	2	N	N	Y	Y	https://www.legis.iowa.gov/docs/iac/chapter/481.844.pdf
Kansas	Kansas State Government	6 (legislator must sponsor)	1.5	N	N	Y	Y	https://www.ksbha.ks.gov/home/showpublisheddocument/186/638672564453800000
Kentucky	Department of Professional Licensing	6 (legislator must sponsor)	1	Y	N	Y	Y	https://kbce.ky.gov/newstatic_Info.aspx?static_ID=427&menuid=122
Louisiana	Department of Health	6 (legislator must sponsor)	1	Y	Unk	N	N	https://lachiropracticboard.com/license-requirements/statutes-and-rules/
Maine	Maine State Legislature	7	2	Y	N	Y	Y	https://www.maine.gov/sos/cec/rules/02/chaps02.htm#297
Maryland	Maryland Department of Health (MDH)	Unk	2	Y	N	Y	Y	https://health.maryland.gov/chiropractic/Pages/education.aspx
Massachusetts	Executive office of health and human services	7	1	Y	N	Y	Unk	https://www.mass.gov/doc/233-cmr-3-continuing-education-requirements/download#:~:text=(1)%20A%20continuing%20education%20course,Dated%202%2D24%2D17)
Michigan	Bureau of professional licensing	7	2	Y	N	N	Y	https://www.michigan.gov/-/media/Project/Websites/lara/healthsystemslicensing/Folder7/LARA_Chiropractic_CE_Brochure_5-11.pdf?rev=8bbe694ea2ec484b81b8ed63fb18299f#:~:text=To%20summarize%3A,expiration%20date%20of%20their%20license.
Minnesota	Minnesota Secretary of State	7	1	Y	Y	Y	Y	https://www.revisor.mn.gov/rules/2500.1200/
Mississippi		Any ten people	1	Y	Y	N	Unk	https://www.msbce.ms.gov/secure/pdfs/CEfordoctors.pdf
Missouri	Missouri Division of Professional Registration	7	2	Y	N	Y	Unk	https://www.sos.mo.gov/cmsimages/adrules/csr/current/20csr/20c2070-2.pdf
Montana	Montana Dept of Labor & Industry	7	1	N	N	Y	Y	https://rules.mt.gov/browse/collections/aec52c46-128e-4279-9068-8af5d5432d74/policies/c15c7d48-4c07-4459-94bb-d47e52500540
Nebraska	Nebraska Dept of Health and Human Services		2	Unk	Unk	Y	Unk	https://rules.nebraska.gov/rules?agencyId=37&titleId=101
Nevada	Nevada Legislative Counsel Bureau	6	2	Y	Unk	N	Y	https://chirobd.nv.gov/CE/
New Hampshire	New Hampshire Office of Professional Licensure and Certification	7	1	Partial	N	Y	Y	https://www.oplc.nh.gov/board-chiropractic-examiners-education-and-exams
New Jersey	Division of Consumer Affairs	1	2	Y	N	Y	Y	https://www.njconsumeraffairs.gov/regulations/Chapter-44E-State-Board-of-Chiropractic-Examiners.pdf
New Mexico	New Mexico Regulation and Licensing Dept	1	1	Y	Unk	Y	Y	https://nmonesource.com/nmos/nmsa/en/item/4397/index.do#!fragment/zoupio-_Toc172540835/BQCwhgziBcwMYgK4DsDWszIQewE4BUBTADwBdoAvbRABwEtsBaAfX2zgEYB2AJgFYALAAYAHAGY+ASgA0ybKUIQAiokK4AntADkW6RDi5sAGyMBhJGmgBCZHsJhcCFWs1a42ZKTrJE3gOYABIQAJohwYF4eAQh0hjS4YHBecLoQ9o4gAMp4pABCmgBKAKIAMkUAagCCAHKmRdKkYABG0GkOCJKSQA
New York	New York State Education Department, Office of the Professions	7	3	Y	N	Y	Y	https://www.op.nysed.gov/professions/chiropractic/continuing-education-faq
North Carolina	Not directly overseen, but subject to NC general statuates, NC general assembly, office of administrative hearsing, and rules review commission	7	1	Y	N	Y	Y	https://ncchiroboard.com/continuing-education-requirements-doctor-of-chiropractic-dc/
North Dakota	North Dakota Century Code (NDCC) Chapter 43-06	1	1	Y	Y	Y	Y	https://www.law.cornell.edu/regulations/north-dakota/N-D-A-C-17-03-02-01
Ohio	Statutes enacted by Ohio General Assembly. Rules enacted by State Board.	7	2	N	N	Y	Y	https://chirobd.ohio.gov/about/publications-and-reports/freq-asked-questions
Oklahoma	Oklahoma legislature	7	1	Y	N	Y	Y	https://casetext.com/statute/oklahoma-statutes/title-59-professions-and-occupations/chapter-5-oklahoma-chiropractic-practice-act/section-16110a-continuing-education
Oregon	Oregon legislature	7	1	N	N	Y	Y	https://secure.sos.state.or.us/oard/viewSingleRule.action?ruleVrsnRsn=310133
Pennsylvania	Pennsylvania General Assembly and Department of State	7	2	Y	N	N	Y	https://www.pacodeandbulletin.gov/Display/pacode?file=/secure/pacode/data/049/chapter5/subchapGtoc.html&d=reduce
Puerto Rico		7	3	Unk	Unk	Y	Y	https://www.salud.pr.gov/CMS/DOWNLOAD/4827
Rhode Island	Rhode Island General Assembly and Rhode Island Department of Health	7	3	N	Unk	Y	Y	https://rules.sos.ri.gov/regulations/part/216-40-05-17
South Carolina	South Carolina Department of Labor, Licensing, and Regulation (LLR)	7	2	N	Unk	Y	Y	https://www.scstatehouse.gov/coderegs/Chapter%2025.pdf
South Dakota	South Dakota Legislature and South Dakota Department of Health	7	2	Y	Unk	Y	Y	https://doh.sd.gov/licensing-and-records/boards/chiropractic/continuing-education-requirements/
Tennessee	Tennessee General Assembly and Tennessee Department of Health	7	1	N	Unk	Y	Y	https://publications.tnsosfiles.com/rules/0260/0260-02.20170518.pdf
Texas	Texas Legislature	6	2	Y	N	N	Y	https://www.tbce.state.tx.us/
Utah	Div. of Professional Licensing	7	2	Y	Unk	Y	Y	https://dopl.utah.gov/chiropractic-physician/
Vermont	Vermont Secretary of State: Office of Professional Regulation	6	2	Unk	Unk	Y	Y	https://sos.vermont.gov/chiropractic/ https://outside.vermont.gov/dept/sos/office_professional_regulation/professions/chiropractic/chiropractic_administrative_rules.pdf
Virginia	Virginia Department of Health Professions	6	2	Y	Unk	Y	Unk	https://www.dhp.virginia.gov/Boards/Medicine/ https://www.virginiachiropractic.org/assets/pdf/PhysicianCE_form/
Washington	Washington State Department of Health	7	1	N	N	Y	Y	https://doh.wa.gov/licenses-permits-and-certificates/professions-new-renew-or-update/chiropractor-chiropractic-x-ray-technician
West Virginia	Secretary of State	7	1	Y	Y, else with approval	N	Y	https://boc.wv.gov/
Wisconsin	Governor & Legislature	6	2	Y	N	N	Y	https://dsps.wi.gov/Pages/BoardsCouncils/Chiropractic/Default.aspx
Wyoming	Professional Licensing Boards Office	1	1	N	N	Y	Y	https://chiropractic.wyo.gov/
*Sponsorship for rule change options: 1) Board, 2) Lobbyist, 3) Professional Assoc., 4) Chiropractic Organization, 5) Member of the Public, 6) All of the above, 7) Unknown
